# Supplementary material for: Ruthenium complexes bearing glucosyl ligands are able to inhibit the amyloid aggregation of short histidine-peptides
Source: Royal Society of Chemistry journal article supplement (doi:10.1039/d3dt01110k), 2023-01-01
Supplement: d3dt01110k1.pdf [file d3dt01110k1.pdf]

## Supporting information

### **Ruthenium complexes bearing glucosyl ligands are able to inhibit the amyloid aggregation of short Histidine-peptides**

*Daniele Florio<sup>1</sup>, Sara La Manna<sup>1</sup>, Alfonso Annunziata<sup>b</sup>, Ilaria Iacobucci<sup>3,4</sup>, Vittoria Monaco<sup>3,4</sup>, Concetta Di Natale<sup>5</sup>, Valentina Mollo<sup>6</sup>, Francesco Ruffo<sup>3</sup>, Maria Monti<sup>3,4</sup>, and Daniela Marasco<sup>1,\*</sup>*

<sup>1</sup>Department of Pharmacy, University of Naples Federico II, 80131, Naples, Italy

<sup>3</sup>Department of Chemical Sciences, University of Naples Federico II, 80126, Naples, Italy

<sup>4</sup>CEINGE Biotecnologie Avanzate “Franco Salvatore” S.c.a r.l., 80131, Naples, Italy

<sup>5</sup>Interdisciplinary Research Centre on Biomaterials (CRIB), Department of Ingegneria Chimica dei Materiali e della Produzione Industriale (DICMAPI), University Federico II, 80125 Naples, Italy

<sup>6</sup>Center for Advanced Biomaterials for Healthcare, Istituto Italiano di Tecnologia (IIT), Largo Barsanti e Matteucci 53, Naples 80125, Italy.

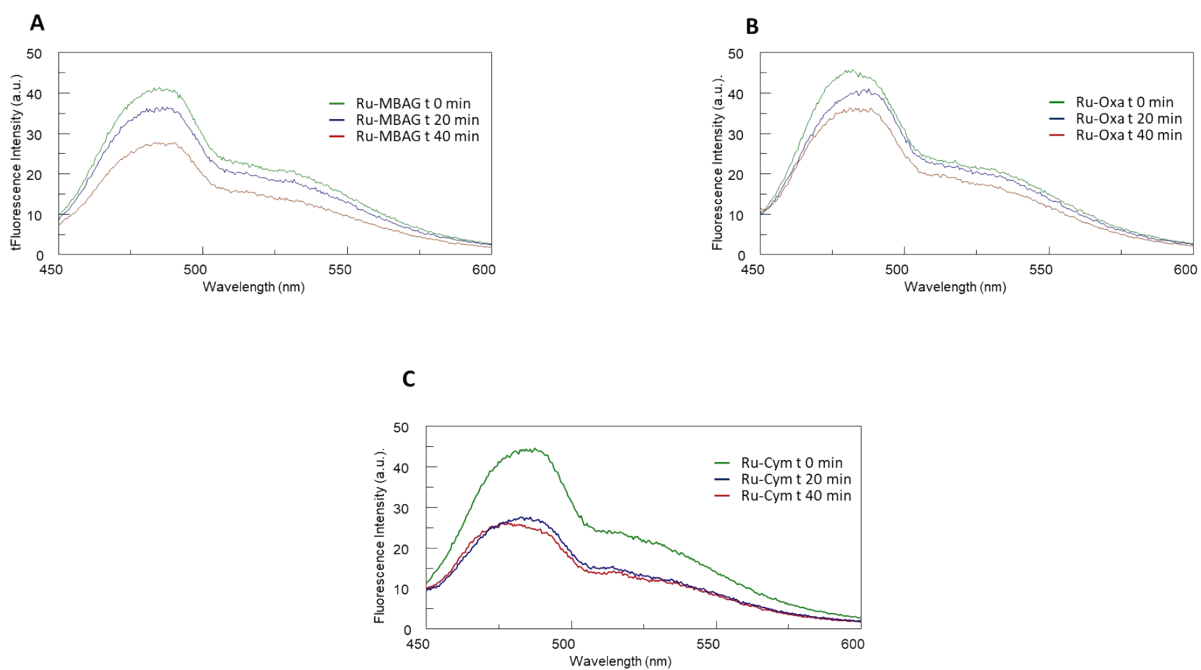

**Fig. S1** Overlay of ThT fluorescence emission intensity of Ru-MBAG (A), Ru-Oxa (B) and Ru-Cym (C) complexes at indicated time.

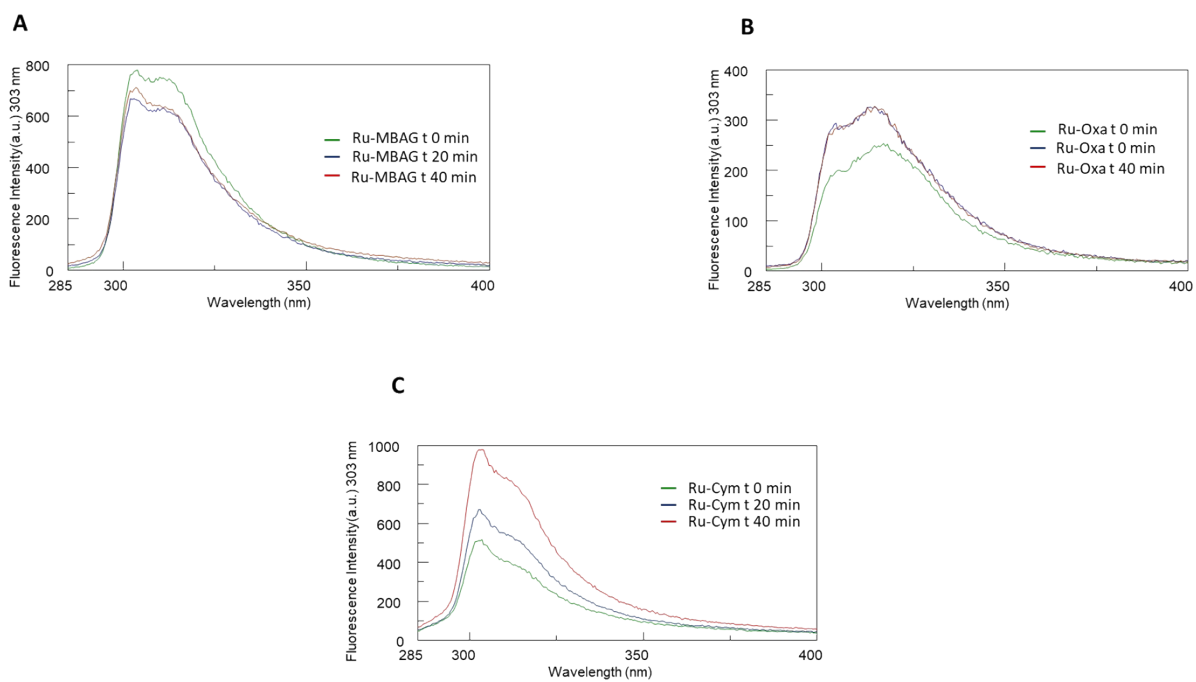

**Fig. S2** Overlay of aromatic intrinsic fluorescence assay of Ru-MBAG (A), Ru-Oxa (B) and Ru-Cym complexes (C) at indicated time.

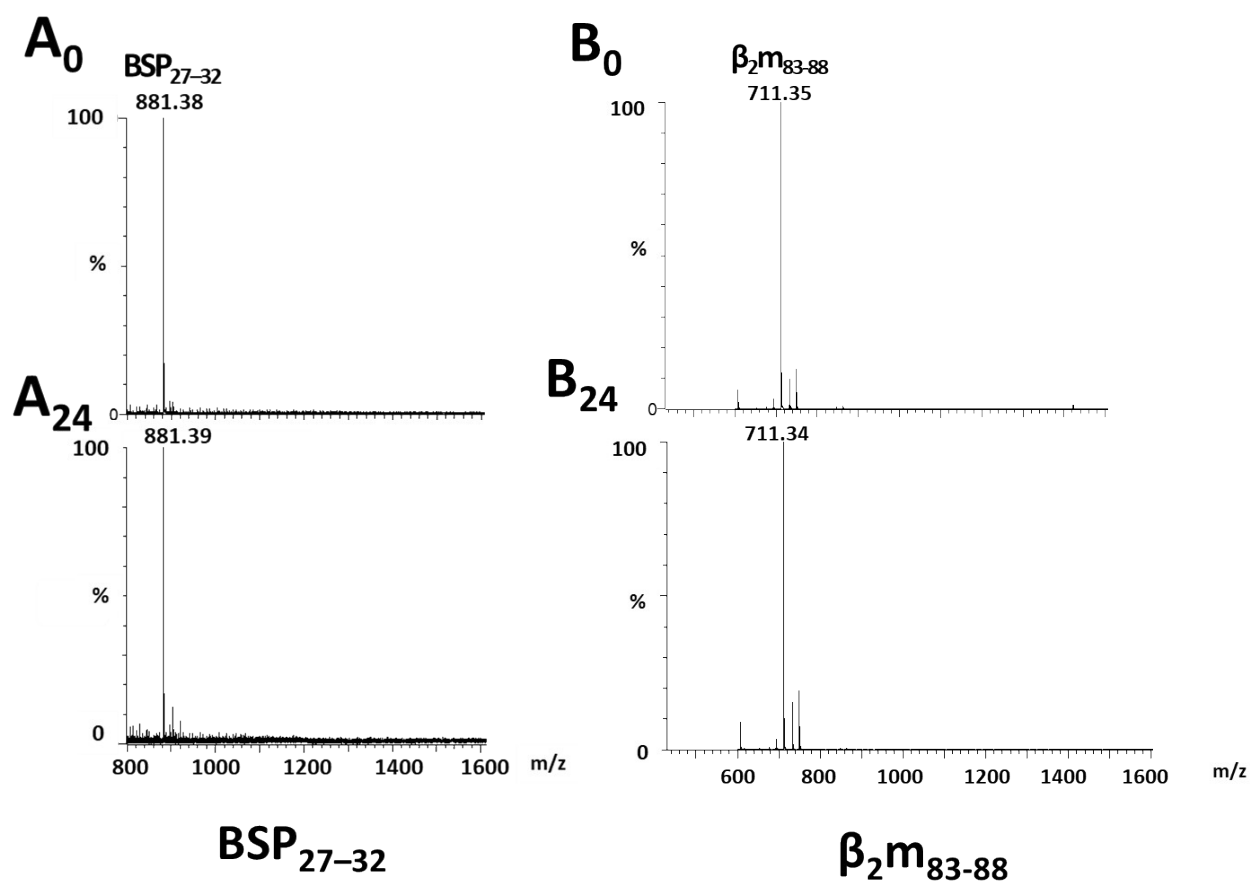

**Figure S3.** ESI-MS spectra of isolated  $BSP_{27-32}$  (A<sub>0</sub>, A<sub>24</sub> panels) and  $\beta_2m_{83-88}$  (B<sub>0</sub>, B<sub>24</sub> panels) at 0 and 24h

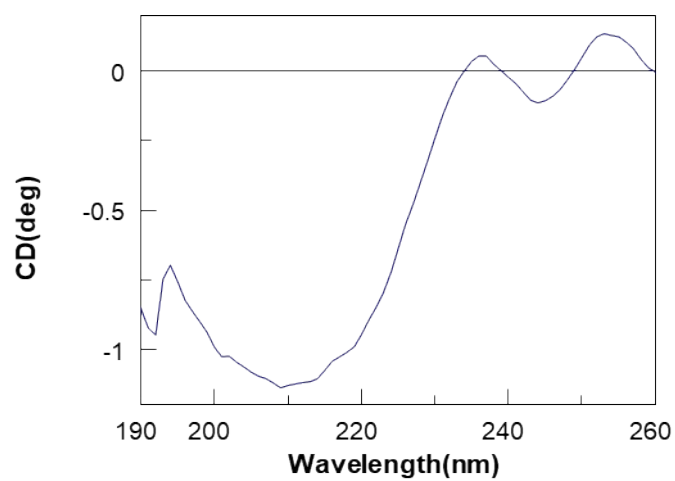

**Figure S4.** Conformational analysis of  $BSP_{27-37}$  at 1mM, phosphate buffer 10mM.

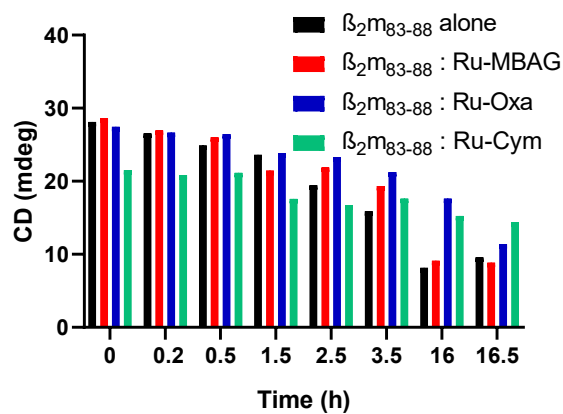

**Figure S5.** Histogram of CD absolute values of  $\beta_2m_{83-88}$  at indicated times.

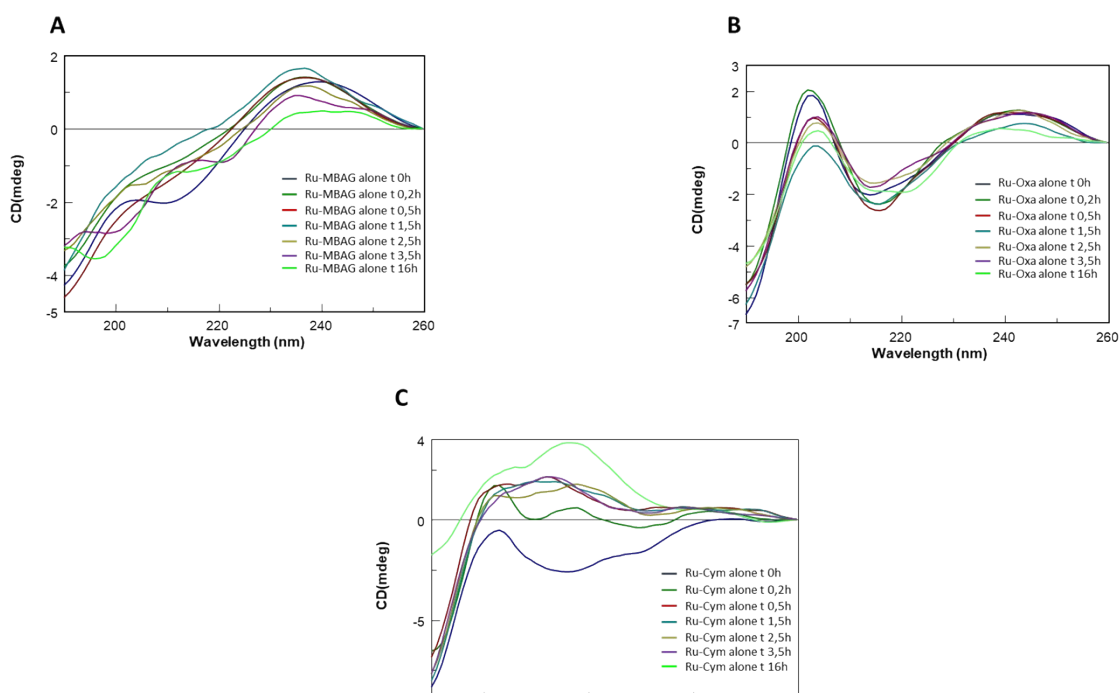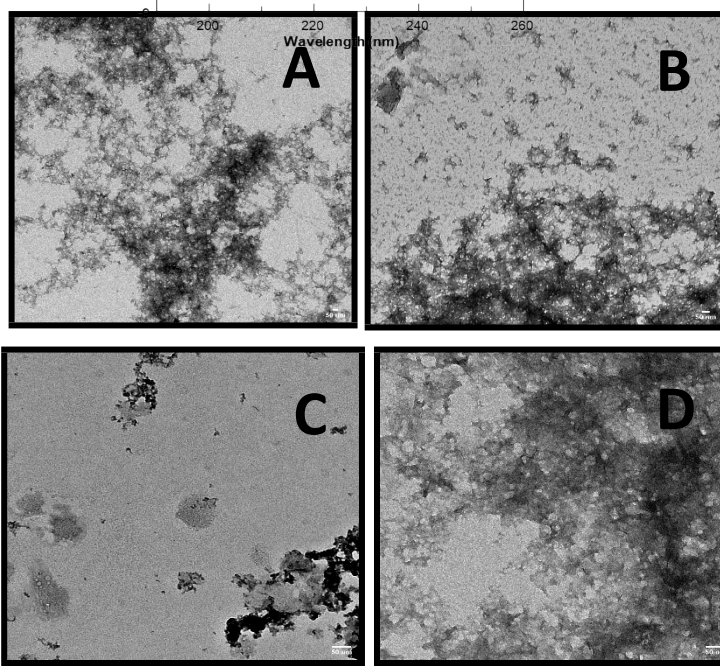

**Fig. S6**  
analysis of Ru(II)-  
Ru-MBAG alone  
alone (400 $\mu$ M) and  
(400 $\mu$ M).

Conformational  
arene complexes. (A)  
(400 $\mu$ M), (B) Ru-Oxa  
(C) Ru-Cym alone

**Figure S7.** TEM analysis at t=4 d of BSP<sub>27-32</sub> peptide (A) alone, and in presence of (B) Ru-Cym, (C) Ru-MBAG and (D) Ru-Oxa.

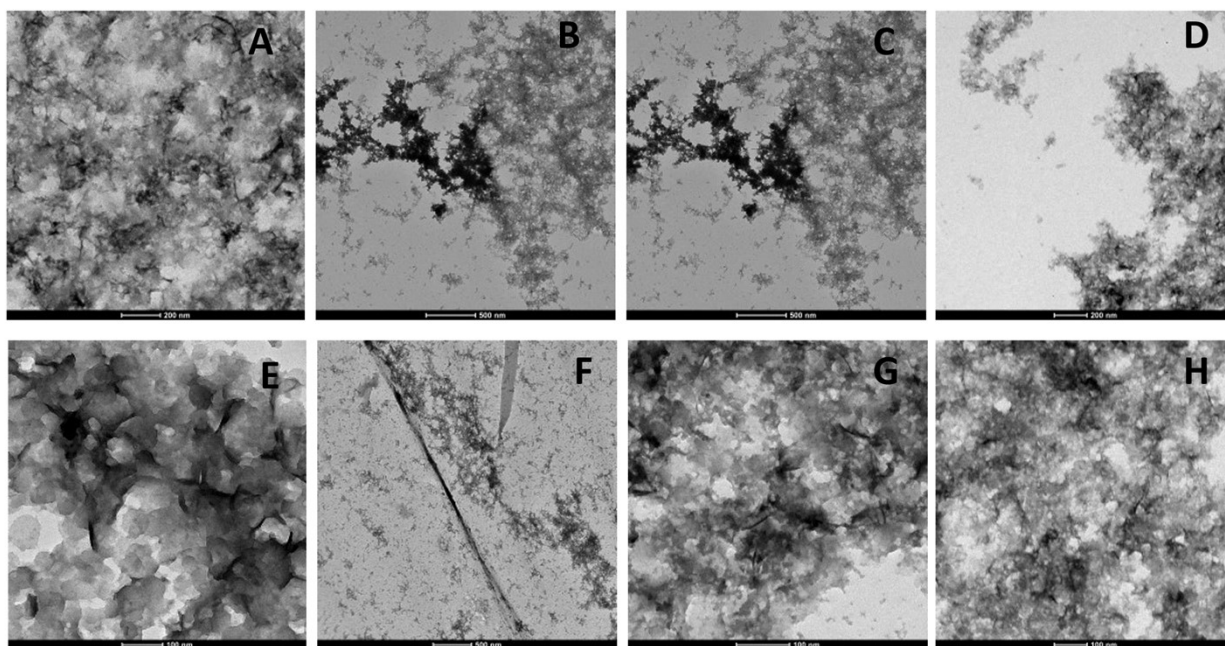

**Fig. S8** TEM analysis of  $\beta 2m_{83-88}$  peptide alone at t 0 and 4 d (A and E) and in presence of Ru-Cym, Ru-MBAG and Ru-Oxa (B-D, t=0), (F-H, t= 4 d).
